# Supplementary material for: Formation of a crystalline nanotube–nanoparticle hybrid by post water-treatment of a thin amorphous TiO2 layer on a TiO2 nanotube array as an efficient photoanode in dye-sensitized solar cells
Source: Royal Society of Chemistry journal article supplement (doi:10.1039/c3ta01339a), 2013-01-01
Supplement: c3ta01339a.pdf [file c3ta01339a.pdf]

## Electronic Supplementary Information

*For*

### Formation of crystalline nanotube/nanoparticle hybrid by post water-treatment of thin amorphous TiO<sub>2</sub> layer decorated on TiO<sub>2</sub> nanotube array for efficient photoanode in dye-sensitized solar cells

Sajith Kurian,<sup>‡a</sup> P. Sudhagar,<sup>‡b</sup> Jaesang Lee,<sup>a</sup> Donghoon Song,<sup>b</sup> Woohyung Choi,<sup>b</sup> Sanghun Lee,<sup>a</sup> Yong Soo Kang,<sup>b\*</sup> and Hyeongtag Jeon<sup>a\*</sup>

<sup>a</sup> Division of Material Science and Engineering, Hanyang University, Seoul, South Korea

<sup>b</sup> WCU Program Department of Energy Engineering and Center for Next Generation Dye-sensitized Solar Cells, Hanyang University, Seoul 133 791, South Korea

#### S1. X-ray diffraction analysis

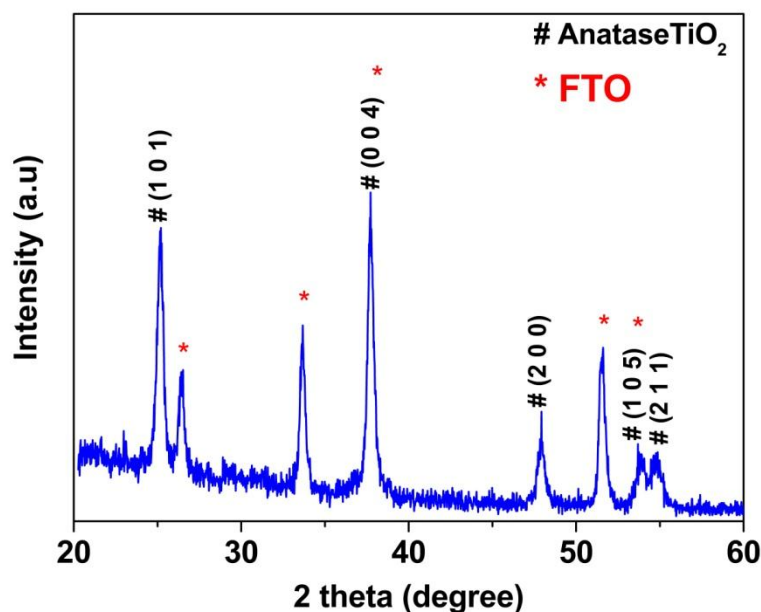

**Figure S1.** XRD profile of anodized TiO<sub>2</sub> NT arrays (TNTAs) after sintering at 450 °C.

## S2. Surface morphology analysis

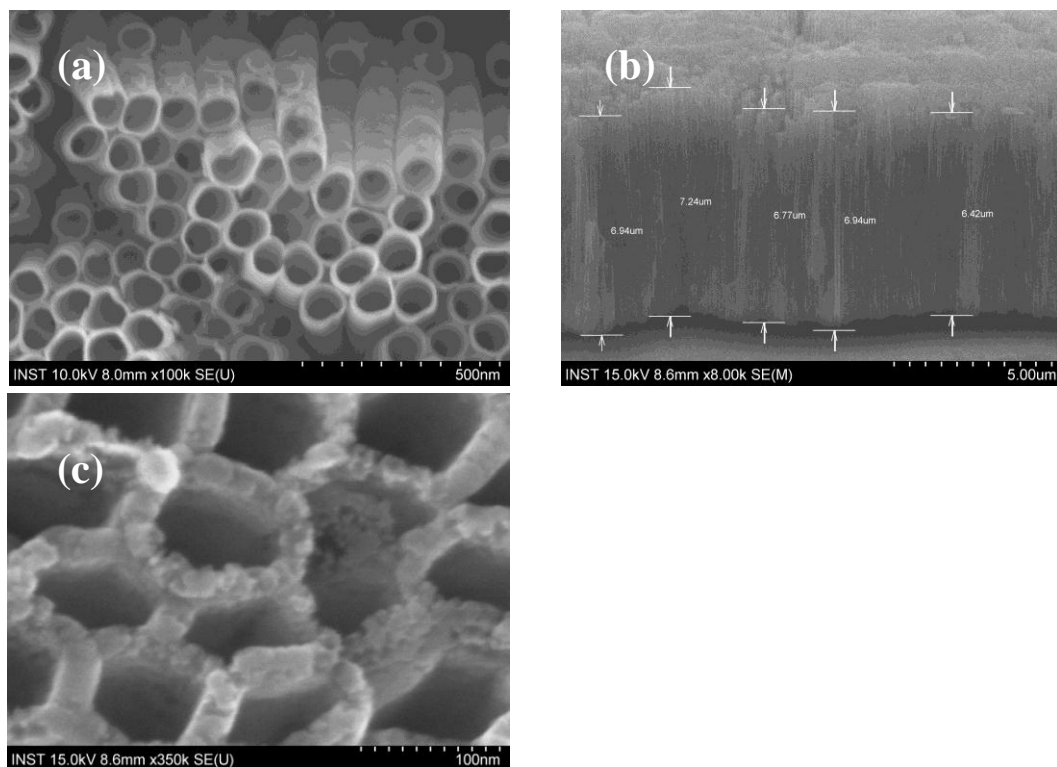

**Figure S2.** (a) Tilted view of anodized  $\text{TiO}_2$  NT arrays, (b) cross sectional image of the annealed  $\text{TiO}_2$  NT array (TNNTA) and (c) 48 h water-treated thin amorphous ALD layer, coated on the  $\text{TiO}_2$  NT array.

### S3. TEM analysis

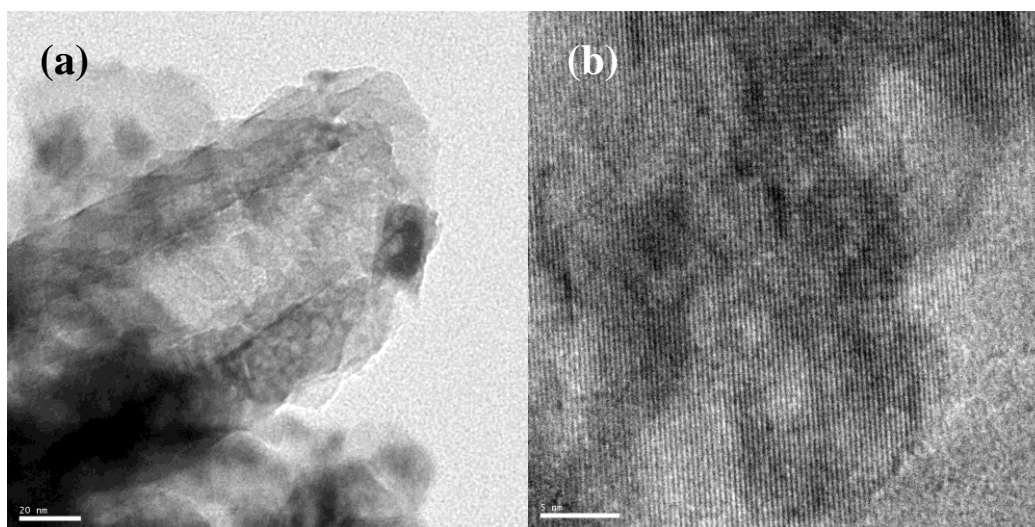

**Figure S3.** (a) TEM images of the water-treated nanotube array after 24 h and (b) high resolution HR-TEM image of (a).

S4. Photovoltaic measurements

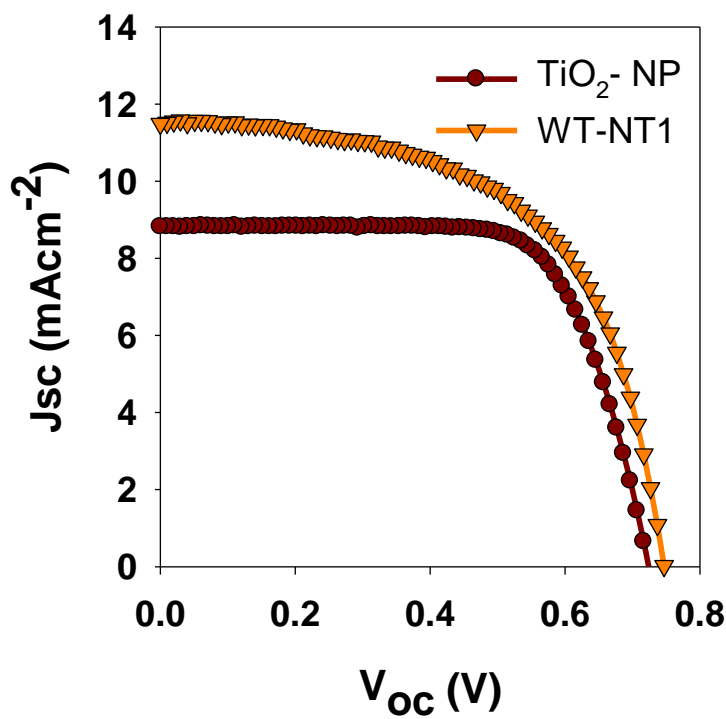

Figure S4. JV plots of DSSCs with different photoanodes

Table S1. Solar cells parameters of DSSCs with different photoanodes (active area of the device 0.25 cm<sup>2</sup>, without mask) under 1 sun condition.

| Photoanode           | V <sub>oc</sub> | J <sub>sc</sub>       | FF   | Efficiency |
|----------------------|-----------------|-----------------------|------|------------|
|                      | (V)             | (mAcm <sup>-2</sup> ) | (%)  | (%)        |
| WT1-NT               | 0.72            | 11.7                  | 57.2 | 4.9        |
| TiO <sub>2</sub> -NP | 0.72            | 8.8                   | 71.3 | 4.5        |

***TiO<sub>2</sub> NP***: mesoporous TiO<sub>2</sub> particulate film (~7 micron thickness) was prepared using a commercially available TiO<sub>2</sub> paste (18 NR-T, Dyesol). This was done using a doctor blade technique and subsequently the particles were sintered at 450 °C for 30 minutes in ambient atmosphere.

Under identical conditions (similar thickness, electrolyte, counter electrode, dye), water treated TiO<sub>2</sub> nanotube electrode (NT/NP) show high photocurrent density (11.7 mAcm<sup>-2</sup>) than that of conventional TiO<sub>2</sub> nanoparticulate electrodes (8.8 mAcm<sup>-2</sup>). This may ascribed to the few reasons (a) high dye loading (b) high scattering effect and (c) efficient charge collection. On the other hand, the formation of NP sites on NT electrodes under water treatment introduces new interfaces which reduce the fill factor of the device.
